# Supplementary material
Source: publisher figshare collection journal article supplement (https://gsajournals.figshare.com/ndownloader/files/23715656)
Supplement: Supplementary file 1 [file 23715656]

## Sheet: Chromosome II- High
Gene name	Other Name	Gene Type	Automated Description	Expr_pattern Tissue	Genomic Study Tissue	Expr_pattern LifeStage
F54D5.7	CELE_F54D5.7	protein_coding	F54D5.7 is an ortholog of human GCDH (glutaryl-CoA dehydrogenase)\; is predicted to have flavin adenine dinucleotide binding activity and oxidoreductase activity, acting on the CH-CH group of donors.	N.A.	germ line, intestine	N.A.
WBGene00271798	CELE_F54D5.24	protein_coding	N.A.	N.A.	N.A.	N.A.
F54D5.17	CELE_F54D5.17	protein_coding	N.A.	N.A.	N.A.	N.A.
F54D5.15	CELE_F54D5.15	protein_coding	N.A.	N.A.	GABAergic neuron	N.A.
F07A11.1	CELE_F07A11.1	protein_coding	F07A11.1 is enriched in the BAG based on tiling and array studies.	N.A.	BAG	N.A.
F07A11.4	CELE_F07A11.4	protein_coding	F07A11.4 is predicted to have metal ion binding activity and thiol-dependent ubiquitinyl hydrolase activity\; is expressed in the body wall musculature, the pharynx, and the reproductive system.	body wall musculature, pharynx, reproductive system, vulval muscle	body wall muscle cell, intestine	adult Ce, larva Ce
kin-6	CELE_ZK20.2	protein_coding	kin-6 is predicted to have ATP binding activity and non-membrane spanning protein tyrosine kinase activity.	N.A.	N.A.	N.A.
sfxn-1.4	CELE_C47D12.3	protein_coding	sfxn-1.4 is an ortholog of human SFXN1 (sideroflexin 1) and SFXN3 (sideroflexin 3)\; is predicted to have ion transmembrane transporter activity.	N.A.	DA neuron, germ line, I5 neuron, male, retrovesicular ganglion, SAB, VA neuron	N.A.
C47D12.4	CELE_C47D12.4	protein_coding	This gene encodes a protein containing an F-box, a motif predicted to mediate protein-protein interactions either with homologs of yeast Skp-1p or with other proteins. C47D12.4 is predicted to encode a protein with the following domain: F-box domain.	N.A.	N.A.	N.A.
F13D12.10	CELE_F13D12.10	protein_coding	N.A.	N.A.	body wall muscle cell, body wall musculature, GABAergic neuron, neuron	N.A.
F44E5.3	CELE_F44E5.3	protein_coding	F44E5.3 is enriched in the NSM based on tiling and array studies\; is predicted to encode a protein with the following domain: Leucine-rich repeat domain superfamily.	N.A.	NSM	N.A.
F44E5.2	CELE_F44E5.2	protein_coding	F44E5.2 is predicted to encode a protein with the following domain: Leucine-rich repeat domain superfamily.	N.A.	N.A.	N.A.
F44E5.15	CELE_F44E5.15	protein_coding	F44E5.15 is predicted to have endonuclease activity.	N.A.	N.A.	N.A.
patr-1	CELE_F43G6.9	protein_coding	patr-1 is an ortholog of human PATL1 and PATL2 (PAT1 homolog 2)\; is predicted to have RNA binding activity\; is involved in determination of adult lifespan\; localizes to the P-body.	N.A.	germ line	N.A.
hda-5	CELE_F43G6.11	protein_coding	hda-5 is an ortholog of human HDAC10 (histone deacetylase 10)\; is predicted to have NAD-dependent histone deacetylase activity (H3-K14 specific).	N.A.	DA neuron, dopaminergic neuron, I5 neuron, intestine, neuron, retrovesicular ganglion, SAB, VA neuron	N.A.
jmjd-1.1	CELE_F43G6.6	protein_coding	jmjd-1.1 is an ortholog of human KDM7A (lysine demethylase 7A), PHF2 (PHD finger protein 2), and PHF8 (PHD finger protein 8)\; is predicted to have metal ion binding activity.	N.A.	germ line, male, ray	N.A.
pes-5	CELE_T27D12.4	protein_coding	N.A.	N.A.	N.A.	embryo Ce
clec-144	CELE_T27D12.3	protein_coding	clec-144 is predicted to have carbohydrate binding activity.	N.A.	N.A.	N.A.
npp-3	CELE_K12D12.2	protein_coding	npp-3 is an ortholog of human NUP205 (nucleoporin 205)\; is involved in several processes, including embryo development, establishment of mitotic spindle orientation, and regulation of mitotic cell cycle\; is expressed in the embryonic cell.	embryonic cell	germ line, hypodermis, neuron	N.A.
top-2	mel-15, mel-15, mel-15, topo-II, CELE_K12D12.1	protein_coding	top-2 is an ortholog of human TOP2A (DNA topoisomerase II alpha) and TOP2B (DNA topoisomerase II beta)\; is predicted to have several functions, including ATP binding activity, DNA binding activity, and DNA topoisomerase type II (ATP-hydrolyzing) activity\; is involved in mitotic sister chromatid separation\; is expressed in the germ line.	germ line	germ line	N.A.
ZK930.5	CELE_ZK930.5	protein_coding	N.A.	N.A.	gon_male_dtc anterior, gon_male_dtc posterior, Z1.p, Z4.a	N.A.
ZK930.6	CELE_ZK930.6	protein_coding	ZK930.6 is predicted to have ATP binding activity, ATP-dependent peptidase activity, and serine-type endopeptidase activity.	N.A.	gon_male_dtc anterior, gon_male_dtc posterior, male, Z1.p, Z4.a	N.A.
vab-23	CELE_ZK930.3	protein_coding	vab-23 is an ortholog of human ZC4H2 (zinc finger C4H2-type containing)\; is involved in several processes, including cell-cell adhesion, embryonic body morphogenesis, and epidermis morphogenesis\; localizes to the nuclear speck\; is expressed in several tissues, including the reproductive system, the seam cell, the tail, the ventral uterine precursor, and the vulval precursor cell.	Anchor cell, dorsal uterine cell, seam cell, tail, ventral cord neuron, ventral uterine precursor, vulC, vulD, vulE, vulF, vulval cell, vulval muscle, vulval precursor cell	arcade cell, neuron, OLL, pharyngeal-intestinal valve cell, PVD, Z1, Z4	L1 larva Ce, L2 larva Ce, L3 larva Ce, L4 larva Ce
ZK930.7	CELE_ZK930.7	protein_coding	N.A.	N.A.	male	N.A.
mex-1	mel-21, CELE_W03C9.7	protein_coding	mex-1 is predicted to have RNA binding activity\; is involved in several processes, including cell fate specification, embryo development, and embryonic pattern specification\; localizes to the P granule\; is expressed in the germline blastomere, the reproductive system, and the somatic blastomere.	C, D, EMS, germ line, gonad, oocyte, P0, Psub1, Psub2, Psub3, Psub4	germ line, germline precursor cell	adult Ce, blastula embryo Ce, gastrulating embryo Ce
ash-2	Y17G7B.2a, CELE_Y17G7B.2	lincRNA	ash-2 is an ortholog of human ASH2L (ASH2 like, histone lysine methyltransferase complex subunit)\; is predicted to have DNA binding activity, metal ion binding activity, and methyltransferase activity\; is involved in determination of adult lifespan, histone H3-K4 methylation, and transdifferentiation\; localizes to the MLL3\/4 complex\; is expressed in the germ line.	germ line	AFD, germ line, intestine, PLM	N.A.
Y17G7B.23	CELE_Y17G7B.23	protein_coding	N.A.	N.A.	male	N.A.

## Sheet: Chromosome IV- high
Gene name	Other Name	Gene Type	Automated Description	Expr_pattern Tissue	Genomic Study Tissue	Expr_pattern LifeStage
sru-17	CELE_T04A11.10	protein_coding	sru-17 is expressed in the intestine and the nervous system\; is predicted to encode a protein with the following domain: 7TM GPCR, serpentine receptor class u (Sru).	head neuron, intestine, nervous system, tail neuron	N.A.	adult Ce, larva Ce
cul-6	CELE_K08E7.7	protein_coding	cul-6 is an ortholog of human CUL1 (cullin 1)\; is predicted to have ubiquitin protein ligase binding activity\; is involved in defense response to virus\; is expressed in the intestine and the pharynx.	intestine, pharynx	AFD, AVA, body wall muscle cell, GABAergic neuron, gon_male_dtc anterior, gon_male_dtc posterior, muscle cell, neuron, Z1.p, Z4.a	N.A.
wdfy-3	CELE_C26H9A.2	protein_coding	wdfy-3 is an ortholog of human WDFY3 (WD repeat and FYVE domain containing 3)\; is predicted to have metal ion binding activity.	N.A.	ASER, DA neuron, I5 neuron, neuron, NSM, retrovesicular ganglion, SAB, VA neuron	N.A.
T23B5.4	CELE_T23B5.4	protein_coding	T23B5.4 is an ortholog of human C12orf65\; is predicted to have translation release factor activity\; human orthologs of this gene are implicated in combined oxidative phosphorylation deficiency.	N.A.	AFD, germ line	N.A.
ZK897.10	CELE_ZK897.10	protein_coding	N.A.	N.A.	N.A.	N.A.
F07C6.6	CELE_F07C6.6	protein_coding	N.A.	N.A.	body wall muscle cell, intestine	N.A.
nstp-5	CELE_ZK896.9	protein_coding	nstp-5 is predicted to have pyrimidine nucleotide-sugar transmembrane transporter activity.	N.A.	germ line, intestine	N.A.
gcy-18	gcy-26, CELE_ZK896.8	protein_coding	gcy-18 is predicted to have guanylate cyclase activity\; is involved in detection of temperature stimulus, thermosensory behavior, and thermotaxis\; localizes to the microvillus membrane and neuron projection terminus\; is expressed in the amphid sensillum, the head, the intestine, and the nervous system.	AFDL, AFDR, AIML, AIMR, head neuron, intestine, nervous system	AFD, ASER, AVA, neuron	adult Ce, larva Ce
ZK896.1	CELE_ZK896.1	protein_coding	ZK896.1 is predicted to encode a protein with the following domain: CUB-like domain.	N.A.	intestine	N.A.
ZK896.5	CELE_ZK896.5	protein_coding	ZK896.5 is enriched in the AFD based on tiling, array, and RNA-seq studies\; is predicted to encode a protein with the following domain: CUB-like domain.	N.A.	AFD, intestine, pharyngeal muscle cell	N.A.
ZK896.4	CELE_ZK896.4	protein_coding	ZK896.4 is predicted to encode a protein with the following domains: CUB-like domain and Spermadhesin, CUB domain superfamily.	N.A.	intestine	N.A.
K08D8.12	CELE_K08D8.12	protein_coding	N.A.	N.A.	N.A.	N.A.
K08D8.11	CELE_K08D8.11	protein_coding	N.A.	N.A.	N.A.	N.A.
K08D8.9	CELE_K08D8.9	protein_coding	N.A.	N.A.	N.A.	N.A.
K08D8.3	CELE_K08D8.3	protein_coding	K08D8.3 is predicted to encode a protein with the following domain: CUB-like domain.	N.A.	ASER, intestine	N.A.
K08D8.5	CELE_K08D8.5	protein_coding	K08D8.5 is involved in response to gamma radiation\; is expressed in head neurons, the intestine, and the rectal gland cell.	head neuron, intestine, rectal gland cell	intestine	N.A.
irg-6	CELE_C32H11.1	protein_coding	irg-6 is involved in response to gamma radiation.	N.A.	intestine	N.A.
srz-15	CELE_C32H11.2	protein_coding	srz-15 is predicted to encode a protein with the following domain: 7TM GPCR, serpentine receptor class z (Srz).	N.A.	N.A.	N.A.
C32H11.3	CELE_C32H11.3	protein_coding	C32H11.3 is predicted to encode a protein with the following domain: CUB-like domain.	N.A.	N.A.	N.A.
C32H11.6	CELE_C32H11.6	protein_coding	C32H11.6 is predicted to encode a protein with the following domain: Domain of unknown function DUF148.	N.A.	hypodermis	N.A.
dct-19	CELE_C32H11.13	protein_coding	dct-19 is predicted to encode a protein with the following domain: CUB-like domain.	N.A.	N.A.	N.A.
F55G11.10	CELE_F55G11.10	protein_coding	N.A.	N.A.	male	N.A.
abt-3	CELE_F55G11.9	pseudogene	N.A.	N.A.	male	N.A.
F55G11.3	CELE_F55G11.3	pseudogene	N.A.	N.A.	N.A.	N.A.
dod-17	CELE_K10D11.1	protein_coding	dod-17 is involved in innate immune response\; is expressed in the intestine.	intestine	intestine, pharynx	N.A.
K10D11.2	CELE_K10D11.2	protein_coding	K10D11.2 is predicted to encode a protein with the following domain: CUB-like domain.	N.A.	intestine	N.A.
K10D11.3	CELE_K10D11.3	protein_coding	K10D11.3 is enriched in the OLL and the PVD based on microarray, tiling, array, and RNA-seq studies\; is predicted to encode a protein with the following domains: CUB-like domain and Spermadhesin, CUB domain superfamily.	N.A.	intestine, OLL, PVD	N.A.
K10D11.4	CELE_K10D11.4	protein_coding	K10D11.4 is predicted to encode a protein with the following domain: CUB-like domain.	N.A.	germ line, male	N.A.
F49E11.7	CELE_F49E11.7	protein_coding	F49E11.7 is predicted to have phosphoprotein phosphatase activity.	N.A.	germ line, male	N.A.
scl-2	CELE_F49E11.10	protein_coding	scl-2 is an ortholog of human GLIPR1 (GLI pathogenesis related 1) and members of the human CRISP (Cysteine rich secretory protein family) gene family including CRISP1, CRISP3, and CRISP2\; is expressed in the intestinal cell\; is predicted to encode a protein with the following domains: Cysteine-rich secretory protein, allergen V5\/Tpx-1-related, CAP domain, and CAP superfamily.	intestinal cell	excretory cell, intestine, male-specific, pharyngeal muscle cell	adult Ce, embryo Ce, L1 larva Ce, L2 larva Ce, L3 larva Ce, L4 larva Ce
scl-4	CELE_C39E9.1	pseudogene	N.A.	N.A.	N.A.	N.A.
scl-7	CELE_C39E9.5	protein_coding	scl-7 is an ortholog of human GLIPR1 (GLI pathogenesis related 1) and members of the human CRISP (Cysteine rich secretory protein family) gene family including CRISP1, CRISP3, and CRISP2\; is predicted to encode a protein with the following domains: Cysteine-rich secretory protein, allergen V5\/Tpx-1-related, Ves allergen, CAP domain, and CAP superfamily.	N.A.	male, male-specific	N.A.
dli-1	CELE_C39E9.14	protein_coding	dli-1 is an ortholog of human DYNC1LI1 (dynein cytoplasmic 1 light intermediate chain 1) and DYNC1LI2 (dynein cytoplasmic 1 light intermediate chain 2)\; is predicted to have microtubule motor activity\; is involved in regulation of dendrite morphogenesis and retrograde axonal transport\; localizes to the microtubule plus-end and neuron projection\; is expressed in ciliated neurons, the hypodermi…	ciliated neuron, hypodermis, neuron, pharynx	body wall muscle cell, germ line, intestine, neuron	N.A.
rde-11	CELE_B0564.11	protein_coding	rde-11 is predicted to have metal ion binding activity.	N.A.	germ line, germline precursor cell, hypodermis	N.A.
F09E8.2	CELE_F09E8.2	protein_coding	crld-1 is an ortholog of human CRELD1 and CRELD2\; is predicted to have calcium ion binding activity.	N.A.	neuron	N.A.
msh-5	CELE_F09E8.3	protein_coding	msh-5 is predicted to have ATP binding activity and mismatched DNA binding activity\; is involved in chiasma assembly\; localizes to the nucleus.	N.A.	DA neuron, GABAergic neuron, germ line, germline precursor cell, I5 neuron, retrovesicular ganglion, SAB, VA neuron	N.A.
scl-14	CELE_F09E8.5	protein_coding	scl-14 is an ortholog of human GLIPR1 (GLI pathogenesis related 1) and members of the human CRISP (Cysteine rich secretory protein family) gene family including CRISP1, CRISP3, and CRISP2\; is predicted to encode a protein with the following domains: Cysteine-rich secretory protein, allergen V5\/Tpx-1-related, Ves allergen, CAP domain, and CAP superfamily.	N.A.	intestine	N.A.
F58D2.3	CELE_F58D2.3	protein_coding	F58D2.3 is predicted to encode a protein with the following domain: Armadillo-type fold.	N.A.	N.A.	N.A.
F58D2.2	CELE_F58D2.2	protein_coding	N.A.	N.A.	GABAergic neuron, germ line, male	N.A.
C48D1.1	CELE_C48D1.1	protein_coding	C48D1.1 is enriched in the AFD, the OLL, and the PVD based on microarray and RNA-seq studies\; is predicted to encode a protein with the following domains: Armadillo-type fold and Leucine-rich repeat domain superfamily.	N.A.	AFD, intestine, OLL, PVD	N.A.
C48D1.9	CELE_C48D1.9	protein_coding	N.A.	N.A.	male	N.A.
JC8.7	CELE_JC8.7	protein_coding	JC8.7 is an ortholog of human C4orf27\; human HPF1 exhibits histone binding activity.	N.A.	germ line, intestine	N.A.
ttr-51	CELE_JC8.8	protein_coding	ttr-51 is expressed in the spermatheca\; is predicted to encode a protein with the following domains: Transthyretin-like and Transthyretin-like superfamily.	spermatheca	muscle cell	adult Ce
Y67H2A.10	CELE_Y67H2A.10	protein_coding	Y67H2A.10 is predicted to have nucleic acid binding activity.	N.A.	body wall musculature, germ line	N.A.
Y67H2A.2	CELE_Y67H2A.2	protein_coding	Y67H2A.2 is an ortholog of human KLHDC10\; is predicted to encode a protein with the following domain: Kelch-type beta propeller.	N.A.	germ line	N.A.
Y67H2A.7	CELE_Y67H2A.7	protein_coding	Y67H2A.7 is an ortholog of human MIPEP (mitochondrial intermediate peptidase)\; is predicted to have metal ion binding activity and metalloendopeptidase activity.	N.A.	germ line, germline precursor cell, intestine	N.A.
Y67H2A.9	CELE_Y67H2A.9	pseudogene	N.A.	N.A.	intestine	N.A.
rab-19	CELE_Y62E10A.9	protein_coding	rab-19 is an ortholog of human RAB19 (RAB19, member RAS oncogene family) and RAB43 (RAB43, member RAS oncogene family)\; is predicted to have GTP binding activity and GTPase activity\; is expressed in the anal depressor muscle and the excretory cell.	anal depressor muscle, excretory cell, head muscle, motor neuron, vulva	muscle cell, neuron, NSM, OLL, PVD	adult Ce, embryo Ce, larva Ce
Y62E10A.13	CELE_Y62E10A.13	protein_coding	Y62E10A.13 is an ortholog of human PSPH (phosphoserine phosphatase)\; is predicted to have phosphoserine phosphatase activity\; is expressed in the head and the intestine\; human orthologs of this gene are implicated in PSPH deficiency.	head, intestine	body wall musculature, coelomocyte, DA neuron, germline precursor cell, hypodermis, I5 neuron, intestine, neuron, OLL, pharynx, PVD, retrovesicular ganglion, SAB, VA neuron	adult Ce, larva Ce
cyp-31A5	CELE_Y62E10A.15	protein_coding	cyp-31A5 is predicted to have heme binding activity, iron ion binding activity, and oxidoreductase activity, acting on paired donors, with incorporation or reduction of molecular oxygen.	N.A.	AFD, germ line	N.A.
K09B11.4	CELE_K09B11.4	protein_coding	N.A.	N.A.	N.A.	N.A.
dcap-2	ndx-5, dcp2, CELE_F52G2.1	protein_coding	dcap-2 is an ortholog of human DCP2 (decapping mRNA 2)\; exhibits m7G(5')pppN diphosphatase activity\; is involved in several processes, including deadenylation-dependent decapping of nuclear-transcribed mRNA, determination of adult lifespan, and nematode larval development\; localizes to the P granule and P-body.	N.A.	AFD, germ line, neuron	N.A.
rsd-2	CELE_F52G2.2	protein_coding	rsd-2 localizes to the cytoplasmic part and intracellular organelle\; is expressed in germ cells and the intestine.	germ cell, intestine	coelomocyte, DA neuron, germ line, germline precursor cell, I5 neuron, intestine, OLL, PVD, retrovesicular ganglion, SAB, VA neuron	adult Ce, embryo Ce
F52G2.3	CELE_F52G2.3	protein_coding	F52G2.3 is enriched in the OLL and the PVD based on microarray, tiling, array, and RNA-seq studies\; is predicted to encode a protein with the following domain: RSD-2, N-terminal.	N.A.	body wall muscle cell, intestine, OLL, PVD	N.A.
srd-10	CELE_Y45F10B.14	protein_coding	srd-10 is predicted to encode a protein with the following domain: 7TM GPCR, serpentine receptor class d (Srd).	N.A.	N.A.	N.A.
Y45F10B.8	CELE_Y45F10B.8	protein_coding	Y45F10B.8 is predicted to encode a protein with the following domains: Zinc finger, RING-type and Zinc finger, RING\/FYVE\/PHD-type.	N.A.	male	N.A.
sru-16	CELE_Y45F10B.4	protein_coding	sru-16 is predicted to encode a protein with the following domain: 7TM GPCR, serpentine receptor class u (Sru).	N.A.	N.A.	N.A.
Y45F10B.12	CELE_Y45F10B.12	protein_coding	Y45F10B.12 is predicted to encode a protein with the following domain: F-box associated domain, type 2.	N.A.	N.A.	N.A.
sru-9	CELE_Y45F10B.11	protein_coding	sru-9 is predicted to encode a protein with the following domain: 7TM GPCR, serpentine receptor class u (Sru).	N.A.	N.A.	N.A.
Y45F10B.3	CELE_Y45F10B.3	protein_coding	N.A.	N.A.	amphid sheath cell, arcade cell, male, pharyngeal-intestinal valve cell	N.A.
Y45F10B.59	CELE_Y45F10B.59	protein_coding	N.A.	N.A.	N.A.	N.A.
Y45F10B.15	CELE_Y45F10B.15	pseudogene	N.A.	N.A.	N.A.	N.A.
Y45F10B.18	CELE_Y45F10B.18	pseudogene	N.A.	N.A.	N.A.	N.A.
C08F11.3	CELE_C08F11.3	protein_coding	N.A.	N.A.	intestine	N.A.
fbxa-98	CELE_C08F11.5	protein_coding	fbxa-98 is enriched in the AVA based on tiling, array, and RNA-seq studies\; is predicted to encode a protein with the following domains: F-box domain and Domain of unknown function DUF38, Caenorhabditis species.	N.A.	AVA, intestine	N.A.
C08F11.7	CELE_C08F11.7	protein_coding	C08F11.7 is enriched in the AVA based on tiling, array, and RNA-seq studies\; is predicted to encode a protein with the following domain: SPK domain.	N.A.	AVA, coelomocyte, germ line	N.A.
srz-29	CELE_C08F11.9	protein_coding	srz-29 is predicted to encode a protein with the following domain: 7TM GPCR, serpentine receptor class z (Srz).	N.A.	N.A.	N.A.
C08F11.10	CELE_C08F11.10	protein_coding	C08F11.10 is predicted to encode a protein with the following domain: AH\/BAR domain superfamily.	N.A.	germ line, male	N.A.
oac-48	CELE_T23G4.4	protein_coding	oac-48 is predicted to have transferase activity, transferring acyl groups other than amino-acyl groups.	N.A.	N.A.	N.A.
T23G4.5	CELE_T23G4.5	protein_coding	T23G4.5 is predicted to encode a protein with the following domain: Domain of unknown function DUF148.	N.A.	body wall muscle cell, coelomocyte, germline precursor cell, male	N.A.
T23G4.127	CELE_T23G4.127	protein_coding	N.A.	N.A.	muscle cell	N.A.
C47A4.1	CELE_C47A4.1	protein_coding	C47A4.1 is an ortholog of human DNAJC25 (DnaJ heat shock protein family (Hsp40) member C25).	N.A.	N.A.	N.A.
gly-10	CELE_Y45F10D.3	protein_coding	gly-10 is an ortholog of human GALNT10 (polypeptide N-acetylgalactosaminyltransferase 10) and GALNTL6 (polypeptide N-acetylgalactosaminyltransferase like 6)\; is predicted to have carbohydrate binding activity, metal ion binding activity, and polypeptide N-acetylgalactosaminyltransferase activity.	N.A.	germ line	N.A.
Y45F10D.7	CELE_Y45F10D.7	protein_coding	Y45F10D.7 is an ortholog of human WDR36 (WD repeat domain 36)\; human orthologs of this gene are implicated in open-angle glaucoma\; human WDR36 exhibits RNA binding activity.	N.A.	germ line, seam cell	N.A.

## Sheet: Chromosome V high
Gene name	Other Name	Gene Type	Automated Description	Expr_pattern Tissue	Genomic Study Tissue	Expr_pattern LifeStage
T03E6.8	CELE_T03E6.8	protein_coding	T03E6.8 is predicted to encode a protein with the following domain: 7TM GPCR, serpentine receptor class h (Srh).	N.A.	intestine, Z1, Z4	N.A.
Y32B12C.1	CELE_Y32B12C.1	protein_coding	Y32B12C.1 is predicted to encode a protein with the following domains: Smr domain and Smr domain superfamily.	N.A.	N.A.	N.A.
srw-54	CELE_Y32B12C.2	protein_coding	srw-54 is predicted to have G-protein coupled peptide receptor activity.	N.A.	N.A.	N.A.
Y70C5A.3	CELE_Y70C5A.3	protein_coding	Y70C5A.3 is predicted to encode a protein with the following domains: F-box domain and Domain of unknown function DUF38, Caenorhabditis species.	N.A.	intestine	N.A.
oac-53	CELE_W06G6.1	protein_coding	oac-53 is predicted to have transferase activity, transferring acyl groups other than amino-acyl groups.	N.A.	intestine	N.A.
srw-75	CELE_W06G6.13	pseudogene	N.A.	N.A.	N.A.	N.A.
srw-76	CELE_W06G6.6	protein_coding	srw-76 is predicted to have G-protein coupled peptide receptor activity.	N.A.	N.A.	N.A.
srw-77	CELE_W06G6.8	protein_coding	srw-77 is predicted to have G-protein coupled peptide receptor activity.	N.A.	N.A.	N.A.
W06G6.9	CELE_W06G6.9	protein_coding	N.A.	N.A.	N.A.	N.A.
W06G6.20	CELE_W06G6.20	protein_coding	N.A.	N.A.	N.A.	N.A.
str-61	CELE_F14F8.1	protein_coding	str-61 is predicted to encode a protein with the following domain: 7TM GPCR, serpentine receptor class r (Str).	N.A.	N.A.	N.A.
srz-2	CELE_F14F8.2	pseudogene	N.A.	N.A.	N.A.	N.A.
srz-103	CELE_F14F8.4	protein_coding	srz-103 is expressed in the nervous system\; is predicted to encode a protein with the following domain: 7TM GPCR, serpentine receptor class z (Srz).	amphid neuron, head neuron, nervous system	N.A.	adult Ce, larva Ce
srw-44	CELE_F14F8.6	protein_coding	srw-44 is predicted to have G-protein coupled peptide receptor activity.	N.A.	N.A.	N.A.
srw-36	CELE_F14F8.7	protein_coding	srw-36 is predicted to have G-protein coupled peptide receptor activity.	N.A.	N.A.	N.A.
srw-43	CELE_F14F8.5	protein_coding	srw-43 is predicted to have G-protein coupled peptide receptor activity.	N.A.	neuron	N.A.
srz-102	CELE_F14F8.13	protein_coding	srz-102 is predicted to encode a protein with the following domain: 7TM GPCR, serpentine receptor class z (Srz).	N.A.	neuron	N.A.
srw-42	CELE_F14F8.11	protein_coding	srw-42 is predicted to have G-protein coupled peptide receptor activity.	N.A.	N.A.	N.A.
srz-101	CELE_F14F8.12	protein_coding	srz-101 is predicted to encode a protein with the following domain: 7TM GPCR, serpentine receptor class z (Srz).	N.A.	N.A.	N.A.
Y70C5C.1	CELE_Y70C5C.1	protein_coding	Y70C5C.1 is an ortholog of human IDE (insulin degrading enzyme)\; is predicted to have catalytic activity and metal ion binding activity.	N.A.	N.A.	N.A.
clec-9	CELE_Y70C5C.2	protein_coding	clec-9 is predicted to have carbohydrate binding activity.	N.A.	N.A.	N.A.
srh-137	CELE_Y70C5C.4	protein_coding	srh-137 is predicted to encode a protein with the following domain: 7TM GPCR, serpentine receptor class h (Srh).	N.A.	N.A.	N.A.
clec-236	CELE_Y70C5C.5	pseudogene	clec-236 is enriched in the NSM based on tiling, array, and RNA-seq studies.	N.A.	male, NSM	N.A.
T25E12.14	CELE_T25E12.14	protein_coding	N.A.	N.A.	N.A.	N.A.
T25E12.16	CELE_T25E12.16	protein_coding	N.A.	N.A.	amphid sheath cell, male	N.A.
clec-29	CELE_T25E12.9	protein_coding	clec-29 is predicted to have carbohydrate binding activity.	N.A.	N.A.	N.A.
clec-39	CELE_T25E12.7	protein_coding	clec-39 is predicted to have carbohydrate binding activity.	N.A.	body wall musculature	N.A.
gyg-2	CELE_T25E12.5	protein_coding	gyg-2 is an ortholog of human GYG2 (glycogenin 2)\; is predicted to have transferase activity, transferring glycosyl groups\; is expressed in the germ line\; human orthologs of this gene are implicated in glycogen storage disease XV.	germ line	BAG, cephalic sheath cell, DA neuron, germ line, germline precursor cell, gon_male_dtc anterior, gon_male_dtc posterior, hypodermis, pharyngeal muscle cell, VA neuron, Z1.p, Z4.a	adult Ce
clec-40	CELE_T20B3.13	protein_coding	clec-40 is predicted to have carbohydrate binding activity.	N.A.	intestine, muscle cell	N.A.
clec-23	CELE_T20B3.8	pseudogene	N.A.	N.A.	N.A.	N.A.
clec-25	CELE_T20B3.15	protein_coding	clec-25 is predicted to have carbohydrate binding activity.	N.A.	intestine	N.A.
clec-36	CELE_T20B3.16	protein_coding	clec-36 is predicted to have carbohydrate binding activity.	N.A.	intestine, OLL, PVD	N.A.
clec-26	CELE_T20B3.12	protein_coding	clec-26 is predicted to have carbohydrate binding activity.	N.A.	intestine	N.A.
clec-37	CELE_Y102A5B.3	protein_coding	clec-37 is predicted to have carbohydrate binding activity.	N.A.	intestine	N.A.
clec-35	CELE_Y102A5B.2	protein_coding	clec-35 is predicted to have carbohydrate binding activity.	N.A.	intestine	N.A.
clec-22	CELE_F49A5.3	protein_coding	clec-22 is predicted to have carbohydrate binding activity.	N.A.	germ line, intestine	N.A.
clec-32	CELE_F49A5.9	protein_coding	clec-32 is predicted to have carbohydrate binding activity.	N.A.	intestine	N.A.
clec-24	CELE_F49A5.4	protein_coding	clec-24 is predicted to have carbohydrate binding activity.	N.A.	N.A.	N.A.
clec-28	CELE_F49A5.5	protein_coding	clec-28 is predicted to have carbohydrate binding activity.	N.A.	intestine	N.A.
clec-33	CELE_F49A5.7	protein_coding	clec-33 is predicted to have carbohydrate binding activity.	N.A.	intestine	N.A.
thn-4	CELE_F49A5.6	protein_coding	thn-4 is predicted to encode a protein with the following domains: Thaumatin family and Osmotin\/thaumatin-like superfamily.	N.A.	N.A.	N.A.
srw-23	CELE_F49A5.8	protein_coding	srw-23 is predicted to have G-protein coupled peptide receptor activity.	N.A.	N.A.	N.A.
F09C6.11	CELE_F09C6.11	protein_coding	N.A.	N.A.	pharyngeal muscle cell	N.A.
fbxa-44	CELE_F09C6.2	protein_coding	fbxa-44 is predicted to encode a protein with the following domains: F-box domain, Domain of unknown function DUF38, Caenorhabditis species, and F-box-like domain superfamily.	N.A.	pharyngeal muscle cell	N.A.
F09C6.15	CELE_F09C6.15	protein_coding	F09C6.15 is predicted to encode a protein with the following domain: Domain of unknown function DUF38, Caenorhabditis species.	N.A.	N.A.	N.A.
srp-9	CELE_F09C6.5	pseudogene	srp-9 is expressed in the intestine.	intestine	N.A.	larva Ce
fbxa-45	CELE_F09C6.6	protein_coding	fbxa-45 is predicted to encode a protein with the following domains: F-box domain and Domain of unknown function DUF38, Caenorhabditis species.	N.A.	N.A.	N.A.
srd-68	CELE_F09C6.7	protein_coding	srd-68 is enriched in the NSM based on tiling and array studies\; is predicted to encode a protein with the following domain: 7TM GPCR, serpentine receptor class d (Srd).	N.A.	NSM	N.A.
nhr-262	CELE_F09C6.8	protein_coding	nhr-262 is predicted to have several functions, including regulation of cellular process, sequence-specific DNA binding activity, and zinc ion binding activity.	N.A.	N.A.	N.A.
nhr-116	CELE_F09C6.9	protein_coding	nhr-116 is predicted to have DNA-binding activity transcription factor activity, sequence-specific DNA binding activity, and zinc ion binding activity\; is expressed in the seam cell.	seam cell	BAG, DA neuron, I5 neuron, intestine, male-specific, neuron, NSM, OLL, PVD, retrovesicular ganglion, SAB, VA neuron, Z1, Z4	N.A.
F09C6.10	CELE_F09C6.10	protein_coding	N.A.	N.A.	male, male-specific	N.A.
fbxa-206	CELE_Y102A5C.1	protein_coding	fbxa-206 is enriched in the SAB based on tiling, array, RNA-seq, and microarray studies\; is predicted to encode a protein with the following domains: F-box domain, Domain of unknown function DUF38, Caenorhabditis species, and F-box-like domain superfamily.	N.A.	DA neuron, germ line, germline precursor cell, I5 neuron, retrovesicular ganglion, SAB, VA neuron	N.A.
Y102A5C.2	CELE_Y102A5C.2	protein_coding	Y102A5C.2 is enriched in the SAB based on tiling, array, RNA-seq, and microarray studies.	N.A.	DA neuron, germ line, germline precursor cell, I5 neuron, retrovesicular ganglion, SAB, VA neuron	N.A.
Y102A5C.4	CELE_Y102A5C.4	protein_coding	Y102A5C.4 is predicted to encode a protein with the following domain: Protein of unknown function DUF684.	N.A.	N.A.	N.A.
clec-239	CELE_Y102A5C.16	protein_coding	clec-239 is predicted to have carbohydrate binding activity.	N.A.	AFD, NSM	N.A.
srh-119	CELE_Y102A5C.21	protein_coding	srh-119 is predicted to encode a protein with the following domain: 7TM GPCR, serpentine receptor class h (Srh).	N.A.	N.A.	N.A.
Y102A5C.40	CELE_Y102A5C.40	protein_coding	N.A.	N.A.	N.A.	N.A.
